# Supplementary material for: A two-step mechanism for the inactivation of microtubule organizing center function at the centrosome
Source: eLife journal article supplement (doi:10.7554/elife.47867), 2019-06-27
Supplement: supp [file elife-47867-supp-v1.zip]

Archive with 12 entries (12 files):
- elife_poa_e47867_Figure_3_figure_supplement_1.pdf
- elife_poa_e47867_Figure_1_figure_supplement_1.pdf
- elife_poa_e47867_Video_2.mp4
- elife_poa_e47867_Figure_1_figure_supplement_2.pdf
- elife_poa_e47867_Figure_6_figure_supplement_1.pdf
- elife_poa_e47867_Video_4.mp4
- elife_poa_e47867_Figure_4_figure_supplement_1.pdf
- elife_poa_e47867_Figure_4_figure_supplement_2.pdf
- elife_poa_e47867_Video_1.mp4
- elife_poa_e47867_Video_3.mp4
- elife_poa_e47867_Video_5.mp4
- elife_poa_e47867_Transparent_Reporting_File.pdf
