# Supplementary figures and images for: A two-step mechanism for the inactivation of microtubule organizing center function at the centrosome
Source: eLife journal article supplement (doi:10.7554/elife.47867), 2019-06-27

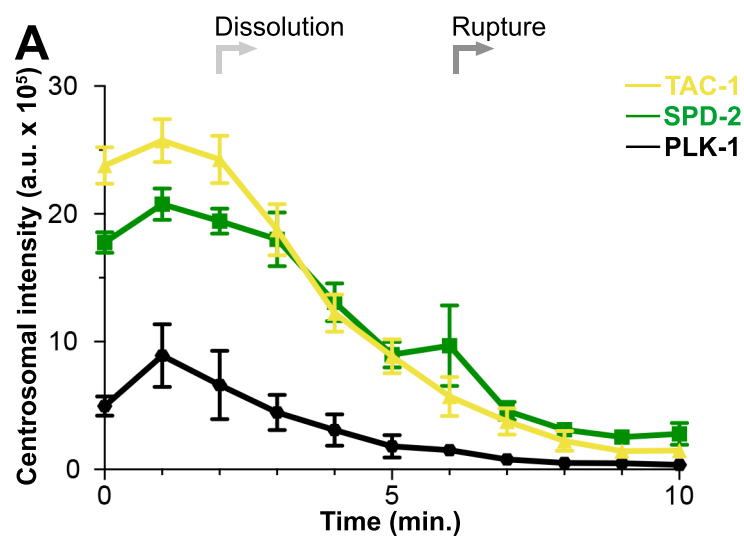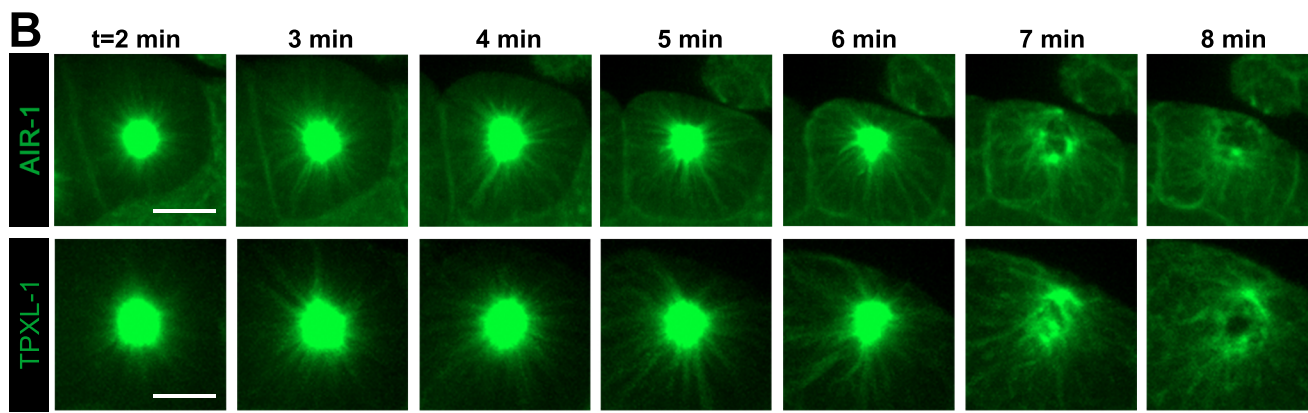

Supplement: supp [file elife-47867-supp-v1.zip › elife_poa_e47867_Figure_3_figure_supplement_1.pdf]

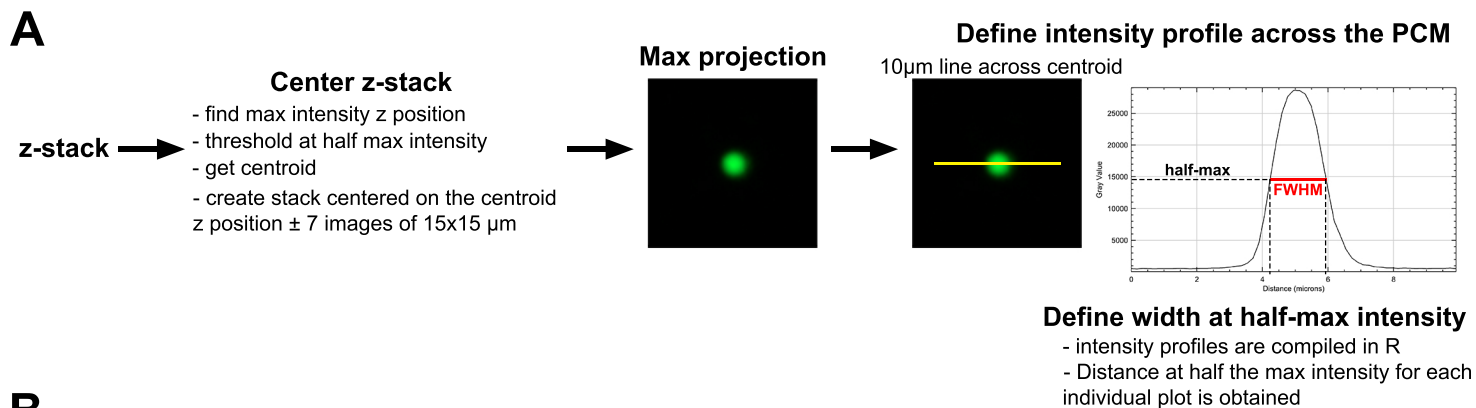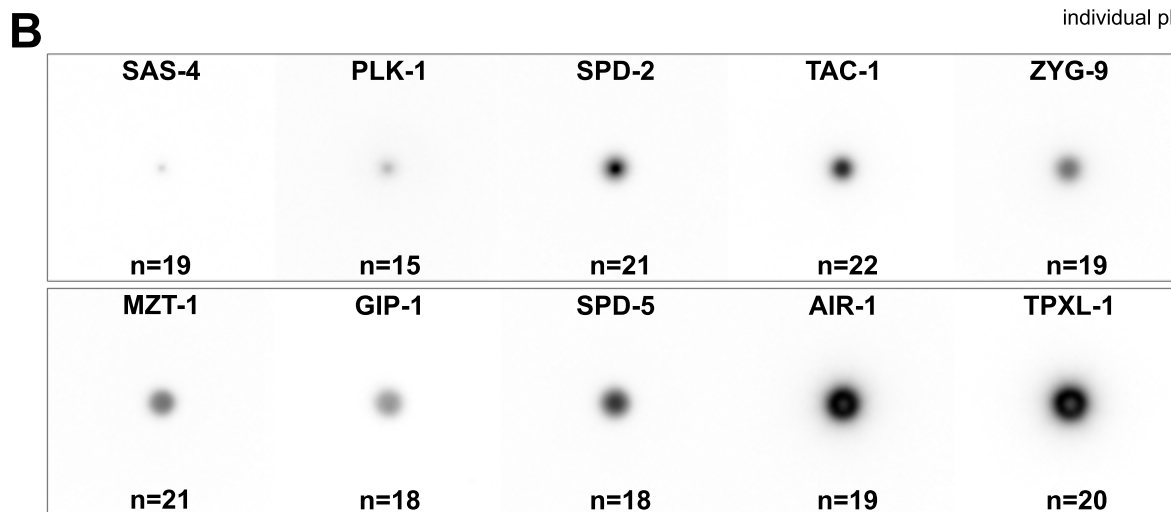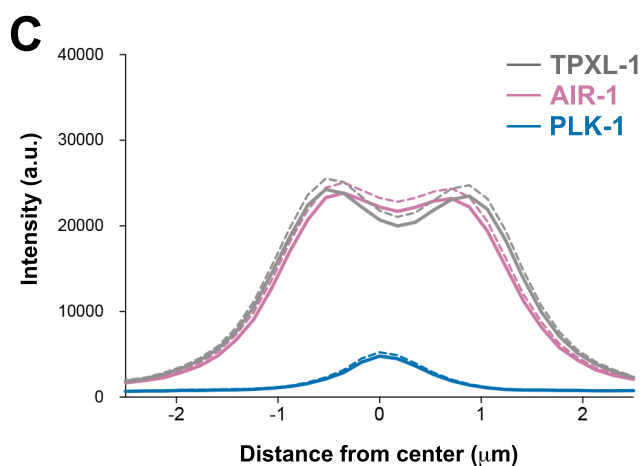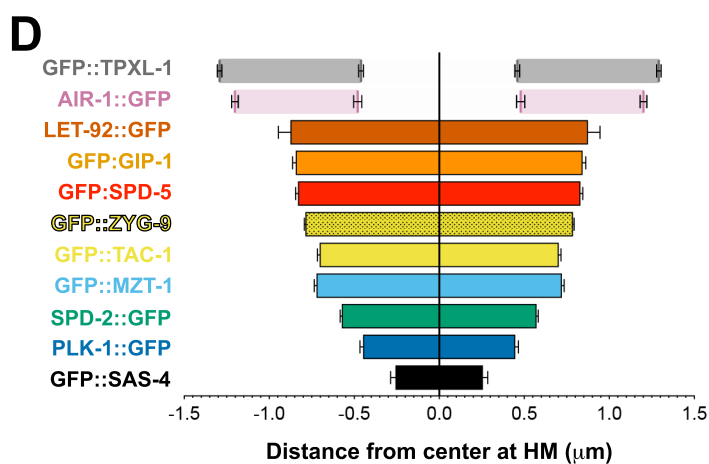

Supplement: supp [file elife-47867-supp-v1.zip › elife_poa_e47867_Figure_1_figure_supplement_1.pdf]

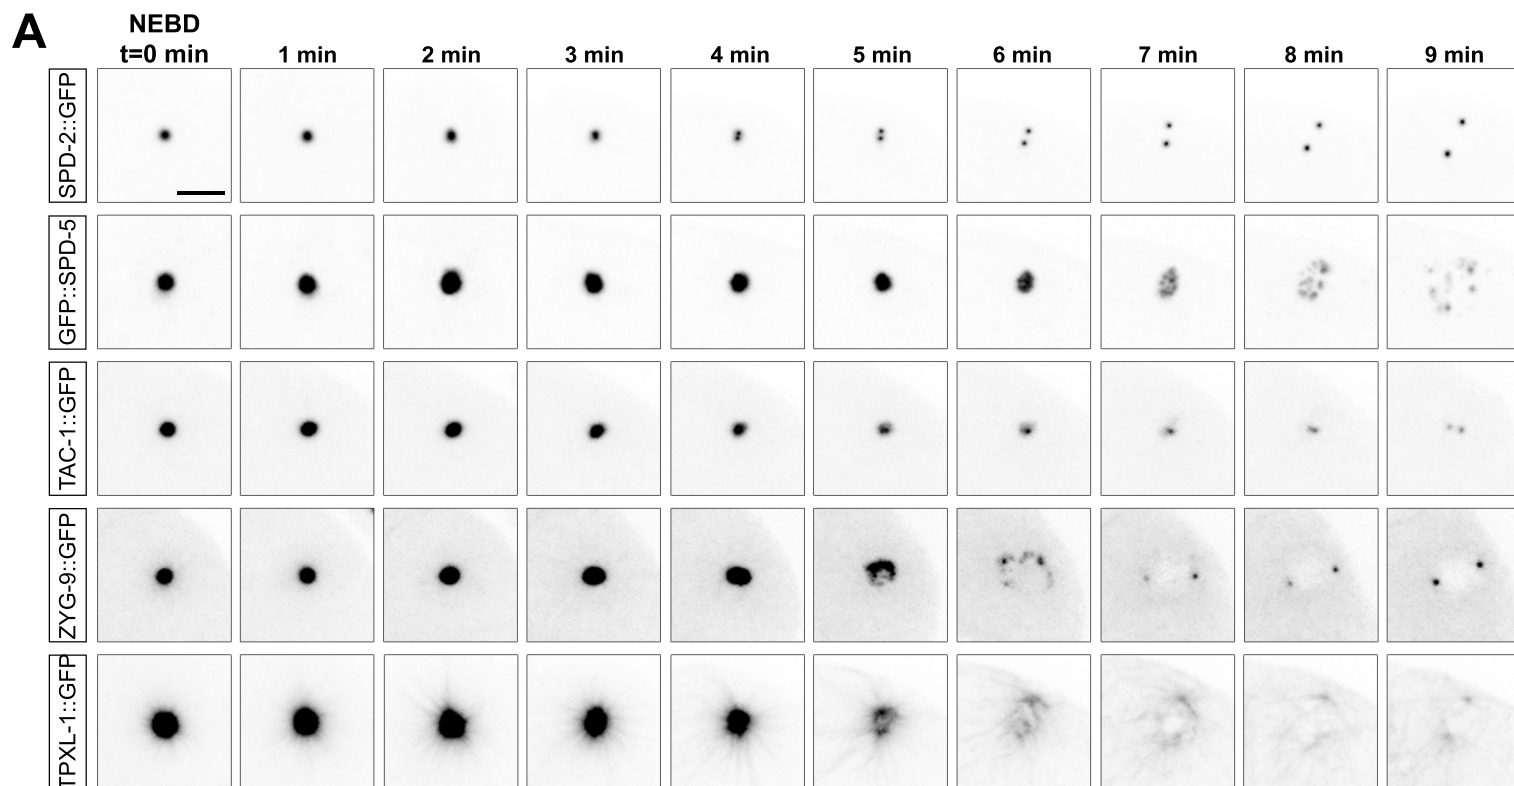

Supplement: supp [file elife-47867-supp-v1.zip › elife_poa_e47867_Figure_1_figure_supplement_2.pdf]

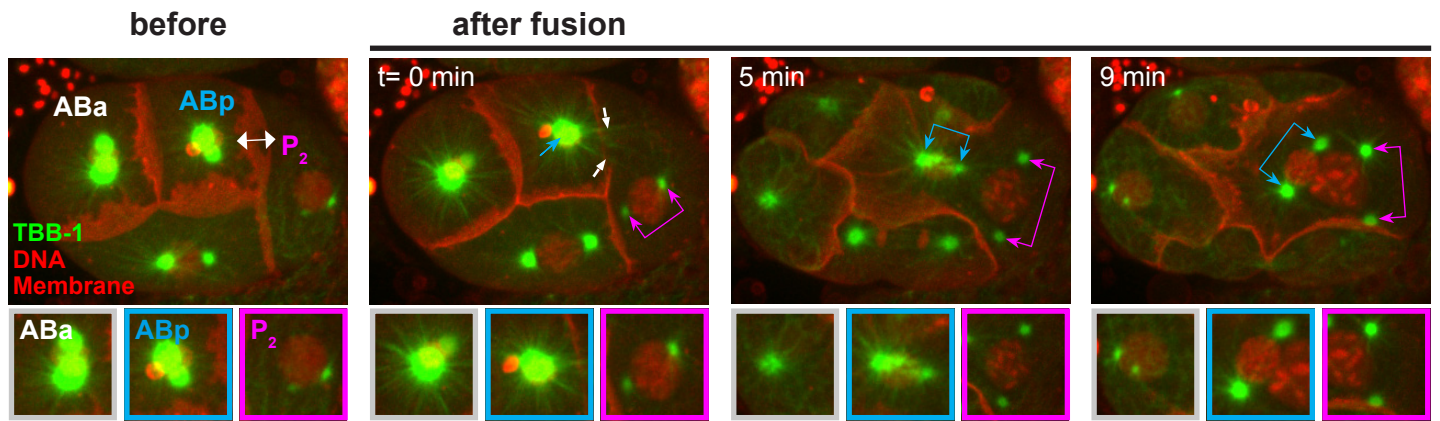

Supplement: supp [file elife-47867-supp-v1.zip › elife_poa_e47867_Figure_6_figure_supplement_1.pdf]

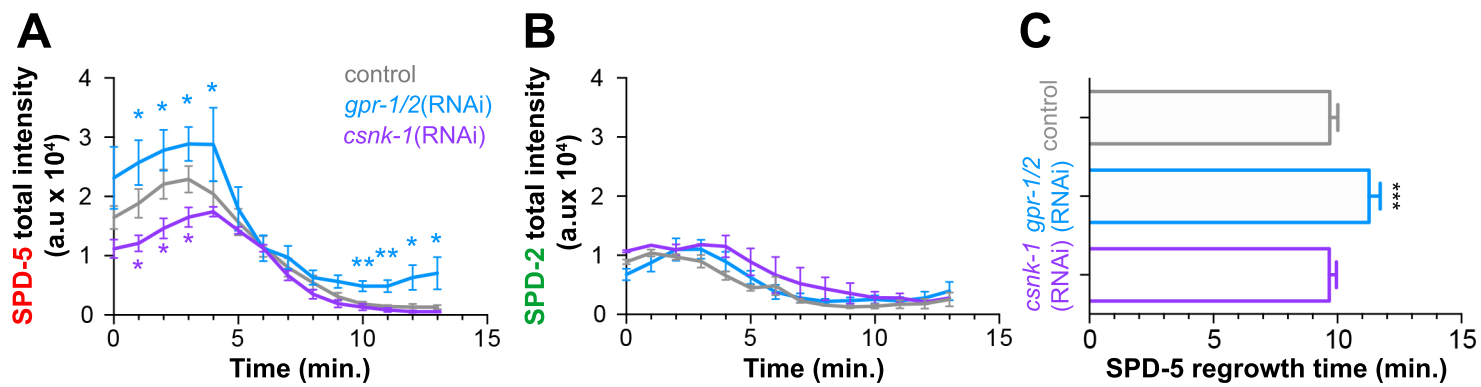

Supplement: supp [file elife-47867-supp-v1.zip › elife_poa_e47867_Figure_4_figure_supplement_1.pdf]

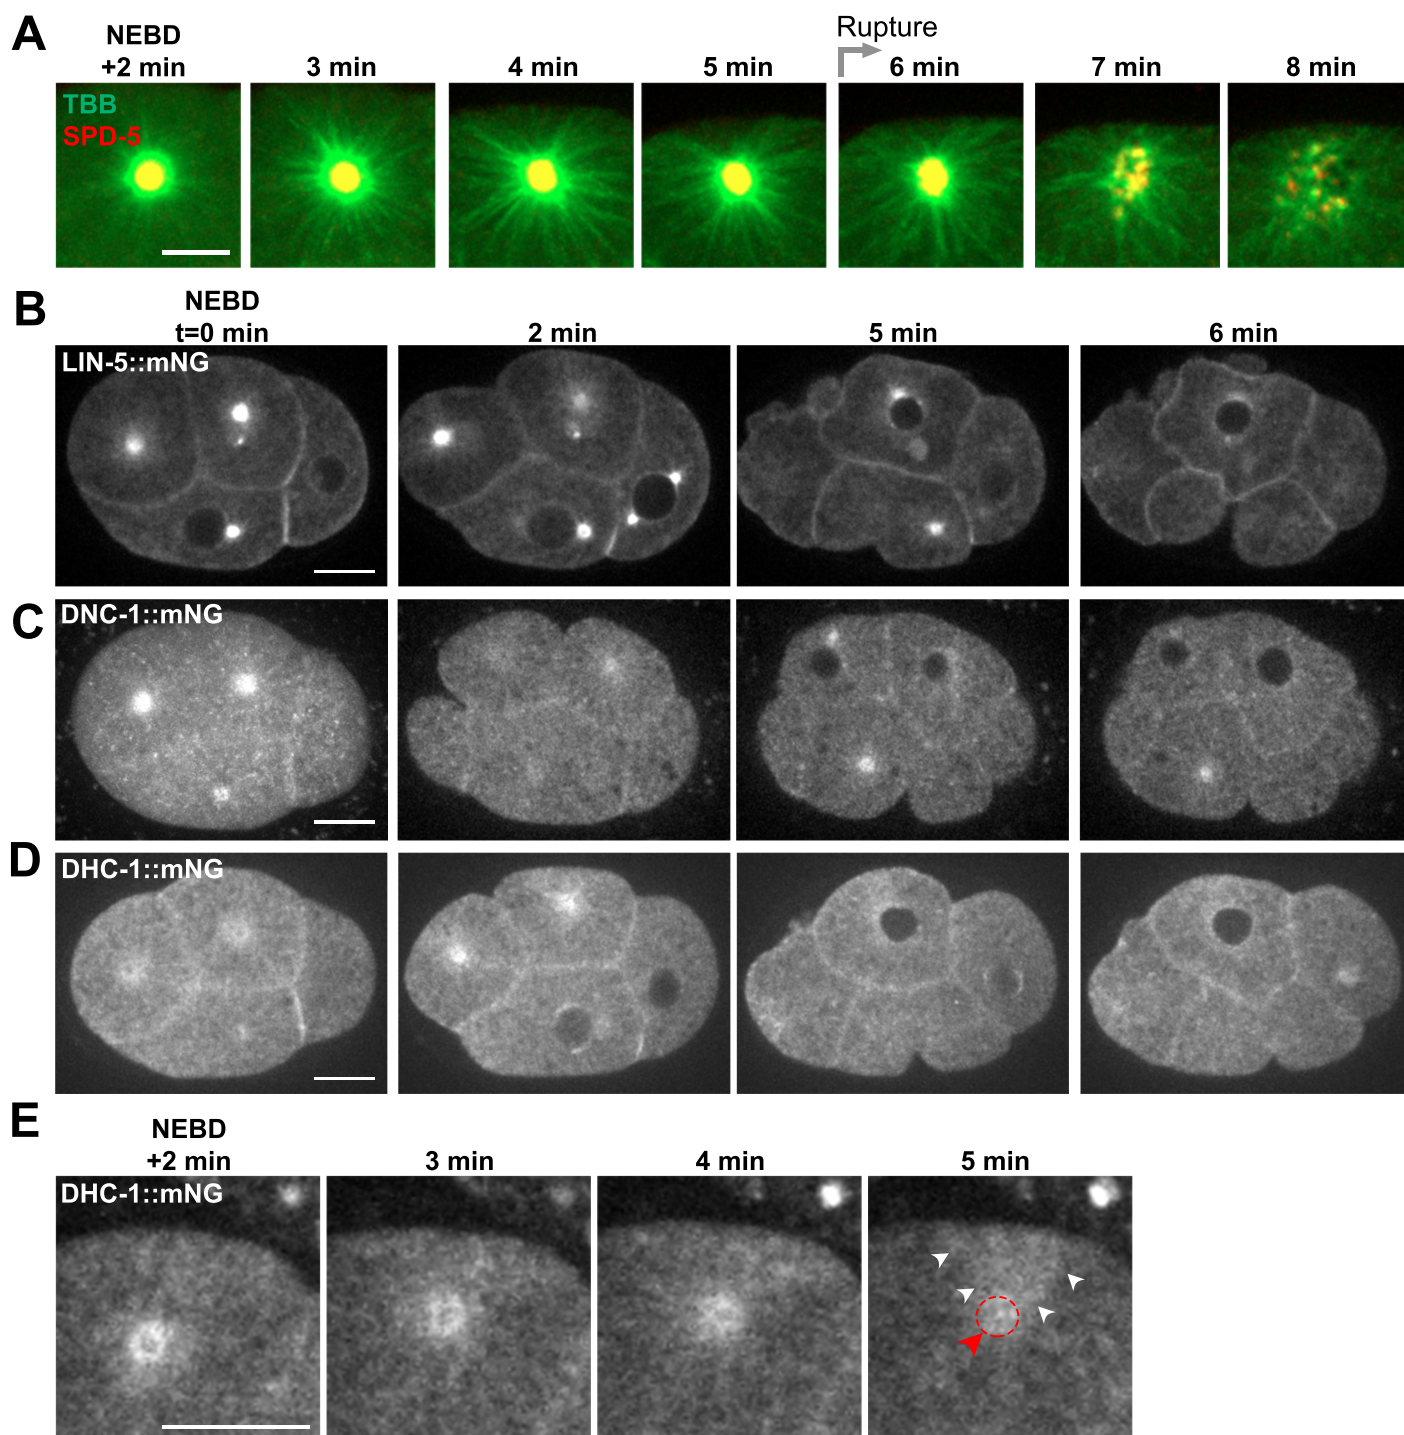

Supplement: supp [file elife-47867-supp-v1.zip › elife_poa_e47867_Figure_4_figure_supplement_2.pdf]
